1 **Title: Patterns of microbiome variation among infrapopulations of permanent**  
2 **bloodsucking parasites**

3  
4 **Authors:** Jorge Doña<sup>1,2\*</sup>, Stephany Virrueta Herrera<sup>1</sup>, Tommi Nyman<sup>3</sup>, Mervi Kunnasranta<sup>4,5</sup>,  
5 and Kevin P. Johnson<sup>1\*</sup>

6 **Author details:**

7 <sup>1</sup>Illinois Natural History Survey, Prairie Research Institute, University of Illinois at Urbana-  
8 Champaign, 1816 S. Oak St., Champaign, Illinois 61820, USA.

9 <sup>2</sup>Departamento de Biología Animal, Universidad de Granada, Granada, 18001, Spain.

10 <sup>3</sup>Department of Ecosystems in the Barents Region, Norwegian Institute of Bioeconomy  
11 Research, Svanhovd 35, 9925 Svanvik, Norway.

12 <sup>4</sup>Department of Environmental and Biological Sciences, University of Eastern Finland,  
13 Yliopistokatu 7, 80101 Joensuu, Finland.

14 <sup>5</sup>Natural Resources Institute Finland, Joensuu, Finland.

15 Email addresses: Jorge Doña: [jorged@illinois.edu](mailto:jorged@illinois.edu); Stephany Virrueta Herrera:  
16 [svirru2@illinois.edu](mailto:svirru2@illinois.edu); Tommi Nyman: [tommi.nyman@nibio.no](mailto:tommi.nyman@nibio.no); Mervi Kunnasranta:  
17 [mervi.kunnasranta@uef.fi](mailto:mervi.kunnasranta@uef.fi); Kevin P. Johnson: [kdpjohnso@illinois.edu](mailto:kdpjohnso@illinois.edu)

18 \*Correspondence to: [jorged@illinois.edu](mailto:jorged@illinois.edu), [kpjohnso@illinois.edu](mailto:kpjohnso@illinois.edu).

19

20 **Abstract:**

21 While interspecific variation in microbiome composition can often be readily explained by factors  
22 such as host species identity, there is still limited knowledge of how microbiomes vary at scales  
23 lower than the species level (e.g., between individuals or populations). Here, we evaluated  
24 variation in microbiome composition of individual parasites among infrapopulations (i.e.,  
25 populations of parasites of the same species living on a single host individual). To address this  
26 question, we used genome-resolved and shotgun metagenomic data of 17 infrapopulations  
27 (balanced design) of the permanent, bloodsucking seal louse *Echinophthirius horridus* sampled  
28 from individual Saimaa ringed seals *Pusa hispida saimensis*. Both genome-resolved and read-  
29 based metagenomic classification approaches consistently show that parasite infrapopulation  
30 identity is a significant factor that explains both qualitative and quantitative patterns of microbiome  
31 variation at the intraspecific level. This study contributes to the general understanding of the  
32 factors driving patterns of intraspecific variation in microbiome composition, especially of  
33 bloodsucking parasites, and has implications for understanding how well-known processes  
34 occurring at higher taxonomic levels, such as phyllosymbiosis, might arise in these systems.

35

36 **Keywords:** *genome-resolved metagenomics, host-symbiont, intraspecific variation, lice, microbiota,*  
37 *shotgun metagenomics, symbiont.*

38

## 39 **Introduction**

40 Patterns of inter- and intraspecific variation in microbiome composition of animals have received  
41 much attention because the microbiome may influence many biological processes that have  
42 considerable effects on the host (Clemente et al. 2012; Le Chatelier et al. 2013; Rothschild et al.  
43 2018; Rudman et al. 2019; Velazquez et al. 2019). For instance, particular microbiome  
44 compositions have been found to drive genomic adaptation (Rudman et al. 2019) or to confer  
45 protection against pathogens (Velazquez et al. 2019).

46 In general, both stochastic (e.g., dispersal, or ecological drift) and deterministic (e.g., host  
47 immunological regulation, or microbe–microbe interactions) processes operate across multiple  
48 spatial scales to shape the composition of animal microbiomes (Adair and Douglas 2017; Kohl  
49 2020). In particular, among the many determinants shaping microbiome composition, host species  
50 identity has been repeatedly identified as a key factor determining the composition of animal  
51 microbiomes (Brooks et al. 2016; Mazel et al. 2018; Nishida and Ochman 2018; Lutz et al. 2019;  
52 Knowles et al. 2019; Lim and Bordenstein 2020; Song et al. 2020). In other words, microbiomes  
53 of individuals of the same species tend to be more similar than to those of another species. This  
54 pattern is generally the result of filtering microbial taxa by the host (e.g., through host diet, habitat,  
55 or immune system, Adair and Douglas 2017) or result from host-microbe coevolution (Lim and  
56 Bordenstein 2020). When this process exhibits phylogenetic signal, the pattern is known as  
57 phyllosymbiosis (i.e., microbial community relationships that recapitulate the phylogeny of their  
58 host, Brucker and Bordenstein 2013; Brooks et al. 2016; Lim and Bordenstein 2020). Nonetheless,  
59 several aspects of the variation of animal microbiomes are yet to be better understood (Lim and  
60 Bordenstein 2020). In particular, for non-human animals, there is still much to learn about how  
61 microbiomes vary at scales below the species level, such as between populations (Blekhman et al.

62 2015; Kohl et al. 2018; Rothschild et al. 2018; Campbell et al. 2020; Fountain-Jones et al. 2020)

63 or ecotypes (Agany et al. 2020).

64 An area of focus on understanding intraspecific variation in microbiome composition has been

65 bloodsucking parasites. In these parasites, previous studies have consistently found a major role

66 of the host species in shaping microbiome composition in the parasites (Osei-Poku et al. 2012;

67 Zhang et al. 2014; Swei and Kwan 2017; Zolnik et al. 2018; Landesman et al. 2019; Lee et al.

68 2019; Muturi et al. 2019). However, in ticks (*Ixodes scapularis*), host individual identity of the

69 blood meal was even more important than host species identity in explaining microbiome

70 composition (Landesman et al. 2019). These results suggested that individual host identity of the

71 blood meal might be an important factor that shapes parasite microbiomes at the intraspecific level

72 (Landesman et al. 2019). In theory, microbiomes of individual bloodsucking parasites could vary

73 due to: 1) the individual parasite immune system that may impose selection on different bacterial

74 taxa (Blekhman et al. 2015; Suzuki et al. 2019), 2) differences in the source of the blood meal that

75 may transfer or disperse particular bacterial taxa, or modulate bacteria by creating specific

76 conditions during digestion (Rothschild et al. 2018), 3) microbe–microbe interactions (Hassani et

77 al. 2018), and 4) stochastic processes (e.g., ecological drift) (Lankau et al. 2012). However, for

78 most species, and for bloodsucking parasites in particular, the nature of intraspecific variation in

79 microbiomes and the relative importance of factors shaping this variation remain understudied.

80 Sucking lice (Phthiraptera: Anoplura) are permanent blood-feeding ectoparasites that live in the

81 fur or hairs of mammals. The sucking lice of pinnipeds (seals, sea lions, and walrus) are of

82 particular interest because of their need to adapt to the aquatic lifestyle of their hosts (Durden and

83 Musser 1994; Leonardi et al. 2013). There is evidence that the sucking lice of seals and sea lions

84 have codiversified with their hosts (Kim 1971, 1975, 1985; Leonardi et al. 2019). In addition, the  
85 sucking lice of pinnipeds represent an interesting system in which to study the variation in  
86 microbiome composition and the drivers of this variation at an intraspecific level because: 1) these  
87 lice have well defined, isolated populations (intrapopulations) on individual seal hosts, due to an  
88 expected low rate of horizontal dispersal among host individuals, which is only possible during  
89 the seals' haul-out periods on land or ice (Kim 1985; Leonardi et al. 2013, 2019); and 2) these lice  
90 feed only upon the blood of their host (Snodgrass 1944; Kim 1985), so that it can be assumed that  
91 individuals from the same intrapopulation feed upon "exactly" the same resource (i.e., the blood  
92 of the individual seal on which they occur).

93 Here, we used genome-resolved approaches (the construction of draft microbial genomes from  
94 short-read shotgun sequencing data; Bowers et al. 2017; Uritskiy et al. 2018) and metagenomic  
95 classification tools (taxonomic classification of individual sequencing reads; Menzel et al. 2016)  
96 to infer patterns of microbiome variation among individuals of the sucking seal louse  
97 *Echinophthirius horridus* (von Olfers, 1816) inhabiting individual Saimaa ringed seals *Pusa*  
98 *hispida saimensis* (Nordquist, 1899). Our sampling design, involving analysis of two individual  
99 lice from each of 17 seals, allowed us to evaluate the degree to which variation in microbiome  
100 composition among individual lice is explained by the intrapopulation (the identity of the seal  
101 host).

## 102 **Materials and Methods**

### 103 Sampling, DNA extraction, and sequencing

104 Thirty-four individual lice were sampled from 17 individual Saimaa ringed seals (*Pusa hispida*  
105 *saimensis*), which is an endemic endangered landlocked subspecies of the ringed seal living in

106 freshwater Lake Saimaa in Finland (e.g., Nyman et al. 2014). Individual lice were collected from  
107 seals found dead or from seals that were live-captured for telemetry studies (e.g., Niemi et al.  
108 2019), and placed in 2-ml screw-cap tubes with 99.5% ethanol. Lice from a single seal individual  
109 were put in the same tube. Prior to DNA extraction, each louse individual was rinsed with 95%  
110 ethanol and placed alone in a new sterile vial; then, the remaining ethanol was evaporated at room  
111 temperature.

112 Whole lice were ground up individually, and genomic DNA was extracted using the Qiagen  
113 QIAamp DNA Micro Kit (Qiagen, Valencia, CA, U.S.A.). The standard protocol was modified  
114 so that specimens were incubated in ATL buffer and proteinase K at 55 (insert degree) C for 48 h  
115 instead of the recommended 1 – 3 h, as well as by substituting buffer AE with buffer EB (elution  
116 buffer). This was done to ensure maximal yield (greater than 5 ng) of DNA from each louse. Each  
117 DNA extract was quantified with a Qubit 2.0 Fluorometer (Invitrogen, Carlsbad, CA, U.S.A.)  
118 following the manufacturer's recommended protocols.

119 Shotgun genomic libraries were prepared from the extracts with Hyper Library construction kits  
120 (Kapa Biosystems, Wilmington, MA, U.S.A.), and the libraries were quantitated by qPCR and 150  
121 bp pair-end sequenced on one lane of an Illumina NovaSeq 6000 sequencer (Albany, New York).  
122 FASTQ files from sequence data were generated and demultiplexed with bcl2fastq v.2.20. All  
123 library preparations, sequencing, and FASTQ file generation were carried out at the Roy J. Carver  
124 Biotechnology Center (University of Illinois, Urbana, IL, U.S.A.). Raw reads were subsequently  
125 deposited to the NCBI GenBank SRA database (Table S1).

126 Metagenomic analyses

127

128 For the genome-resolved metagenomic analyses, we used the metaWRAP v1.1.5 pipeline (Uritskiy  
129 et al. 2018) along with all the recommended databases (i.e., Checkm\_DB, NCBI\_nt, and  
130 NCBI\_tax). We used the metaWRAP Read\_qc module with default parameters to quality trim the  
131 reads and to de-contaminate each sample from host reads. For decontamination, we ran a de-novo  
132 genome assembly of an individual louse of the same species, not included in this study, and with  
133 a high amount of sequencing data ("Echor52") in Abyss v2.0.1 (Jackman et al. 2017). Finally, we  
134 filtered out all non-bacterial reads from the contig file using Blobtools v1.0.1 (Laetsch and Blaxter  
135 2017) and used this file to decontaminate all the other samples with the metaWRAP Read\_qc  
136 module. Next, we co-assembled reads from all the samples with the metaWRAP Assembly  
137 module (--usemetaspades option) (Nurk et al. 2017). For this assembly, and because of memory  
138 limitations, we used BBNorm ([sourceforge.net/projects/bbmap/](https://sourceforge.net/projects/bbmap/)) before assembly to reduce the  
139 coverage of the concatenated FASTQ file to a maximum of 100X and to discard reads with  
140 coverage under 3X. We binned reads with the metaWRAP Binning module (--maxbin2 --concoct  
141 --metabat2 options) (Alneberg et al. 2014; Wu et al. 2016; Kang et al. 2019) and then consolidated  
142 the resulting bins into a final bin set with both metaWRAP's Bin\_refinement module (-c 50 -x 10  
143 options) and the Reassemble\_bins module. We quantified the bins resulting from the  
144 Bin\_refinement module with Salmon (Patro et al. 2017) using the Quant\_bins module with default  
145 parameters. Finally, we classified bins using the Classify\_bins module. This module uses Taxator-  
146 tk, which gives highly accurate but conservative classifications (Dröge et al. 2015). Accordingly,  
147 we also uploaded our final metagenome-assembled genomes (MAGs) to MiGA for a  
148 complementary analysis to determine the most likely taxonomic classification and novelty rank of  
149 the bin (Rodriguez-R et al. 2018). We used the NCBI Genome database (Prokaryotes; February  
150 26, 2020 version) for this analysis.

151 For the metagenomic classification of reads, we used the metagenomic classifier Kaiju (Menzel et  
152 al. 2016) with Reference database: nr (Bacteria and Archaea; Database date: 2017-05-16). We  
153 used the default parameters for these analyses – SEG low complexity filter: yes; Run mode:  
154 greedy; Minimum match length: 11; Minimum match score: 75; Allowed mismatches: 5. We then  
155 converted Kaiju's output files into a summary table at the genus and species level and filtered out  
156 taxa with low abundances (<0.1 % of the total reads). We also removed poorly identified taxa  
157 because they would artificially increase the similarity between our samples. Specifically, the  
158 following taxa were excluded: "NA", "Viruses", "archaeon", "uncultured bacterium", "uncultured  
159 Gammaproteobacteria bacterium" (Table S2 and S3).

160 Lastly, we used Decontam v1.2.1 to filter out bacterial taxa exhibiting known statistical properties  
161 of contaminants (Davis et al. 2018). We used the frequency method (*isContaminant* function)  
162 which is based on the inverse relationship between the relative abundance of contaminants and  
163 sample DNA concentration, and also has been found suitable for samples dominated by host DNA  
164 (Willner et al. 2012; Lusk 2014; Salter et al. 2014; Jarvis-Bardy et al. 2015; Hooper et al. 2019;  
165 McArdle and Kaforou 2020). As input for Decontam analyses, we used the aforementioned total  
166 DNA concentration values. Then, as recommended, we explored the distribution of scores  
167 assigned by Decontam to assign the threshold according to bimodality between very low and high  
168 scores (Davis et al. 2018). For the MAGs matrix, no bimodality was found, and thus we used the  
169 0.1 default value (Fig S1a). None of the MAGs were classified as contaminants, according to  
170 Decontam. For Kaiju matrices, a 0.3 threshold value was selected for the species matrix (Fig S1b)  
171 and 0.31 for the genus matrix (Fig S1c). Decontam filtered out a single species (*Clostridia*  
172 bacterium k32) from the species matrix and two genera (*Cupriavidus* and *Massilia*) from the genus  
173 matrix.



174 Statistical analyses

175 To visualize similarities of microbiome composition among louse individuals from the same or  
176 different individual seal hosts, we constructed non-metric multidimensional scaling (NMDS)  
177 ordinations based on Bray–Curtis and Jaccard (binary = T) dissimilarities using the phyloseq  
178 v1.26-1 R package (McMurdie and Holmes 2013). For the genome-resolved metagenomic  
179 analyses, we used the normalized MAGs compositional matrices resulting from Salmon.  
180 Specifically, these MAG counts are standardized to the individual sample size (MAG copies per  
181 million reads) and thus allow between-sample comparisons. For the Kaiju analyses, we used the  
182 `rarefy_even_depth` function of phyloseq (without replacement as in the hypergeometric model) to  
183 rarefy samples to the smallest number of classified sequences per individual observed (85,513, and  
184 71,267 reads in genus and species matrices, respectively) (Weiss et al. 2017). To assess the  
185 influence of individual host identity on the microbiome composition of louse individuals, we  
186 conducted a permutational multivariate analysis of variance (PERMANOVA) (Anderson and  
187 Walsh 2013; Anderson 2014). PERMANOVA analyses were done using the `adonis2` function in  
188 `vegan` v2.5–4 (Oksanen et al. 2019), based on Bray–Curtis and Jaccard distance matrices with 100  
189 iterations. In PERMANOVA analyses, for the individual host identity factor, our within-group  
190 sample size ( $n=2$ ) was smaller than both the total number of groups ( $n=17$ ) and the total sample  
191 size ( $n=34$ ). Thus, to account for a potential deviation in F-statistics and  $R^2$  values (Kelly et al.  
192 2015), we wrote an R simulation that randomly subsampled the infrapopulations from which the  
193 louse came (5 infrapopulations per iteration). We ran 10 iterations and ran a PERMANOVA  
194 analysis for each iteration. Note that, for a few iterations, subsampled samples were too similar  
195 and PERMANOVA could not be done. In addition, we ran PERMANOVA analyses to explore  
196 additional factors (louse sex: male, female; sequencing lane: 1, 2; and host status: dead, alive) that

197 may explain variance in microbiome composition. Furthermore, we included significant factors  
198 as the first factors of the host identity PERMANOVA models (i.e., to obtain the variance explained  
199 by host identity after accounting for the variance explained by that factor). We also restricted the  
200 groups in which permutations could be done to only those with the same value of that vector using  
201 the strata argument (e.g., for a sample collected from a dead host, and for the host-status factor,  
202 permutations could only be done among other dead hosts). Lastly, we ran a Mantel test using the  
203 *mantel* function in *vegan* (method=spearman, permutations=9999) to explore if host locality (i.e.,  
204 the coordinates in which each host was sampled) correlated with the microbiome composition of  
205 louse individuals. For this analysis, we ran 10 iterations of an R simulation in which we randomly  
206 subsampled one louse sample for each individual host and ran a Mantel test for each iteration. The  
207 following packages were used to produce the plots: *ggplot2* v3.1.0.9 (Wickham 2016), *grid* v3.5.3  
208 (R Core Team 2019), *gridExtra* v.2.3 (Auguie 2016), *ggrepel* v0.8.0 (Slowikowski et al. 2019),  
209 *ggpubr* v.0.2.5 (Kassambara 2018), and *ggsci* v2.9 (Xiao 2018).

## 210 **Results**

211 From the genome-resolved metagenomics pipeline, 13 high-quality bacterial metagenome-  
212 assembled genomes (MAGs) were obtained (Table 1; Fig 1). According to MiGA analyses, 10 of  
213 them (77%) likely belong to a species not represented in the NCBI Genome database.

214 Kaiju analyses recovered a higher diversity of microorganisms than did the genome-resolved  
215 approach. These differences are likely because of the quality-filtering parameters used in the  
216 genome-resolved metagenomics pipeline (i.e., these taxa may have been discarded because the  
217 completeness values of their bins were lower than 50% and/or their contamination values were  
218 higher than 10%). Nevertheless, bacterial taxa found in the genome-resolved metagenomic

219 approach were generally found also in Kaiju and with similar relative abundances (Fig 2), and a  
220 similar pattern was found also at the species level (Fig S2).

221 Ordination and PERMANOVA analyses show a major role of infrapopulation identity in  
222 explaining microbiome composition for both presence–absence and quantitative data. In the  
223 genome-resolved metagenomic dissimilarity matrices, most (>84% in all cases) of the variance  
224 was explained by infrapopulation identity (PERMANOVA: Bray-Curtis,  $R^2= 0.857$ ,  $F=6.419$ ,  
225  $P=0.001$ , Fig 3a; Jaccard,  $R^2= 0.842$ ,  $F= 5.671$ ,  $P=0.001$ ; Fig S3a). Results from the simulations  
226 were in line with the results of the regular model, and thus support that our results were not biased  
227 by the sampling design [PERMANOVA: Bray-Curtis,  $R^2$  (min= 0.65, max= 0.98, mean= 0.78);  $P$   
228 (min= 0.001, max= 0.019,  $n<0.05= 10/10$ ); Jaccard,  $R^2$  (min= 0.66, max= 1, mean= 0.86),  $P$  (min=  
229 0.001, max= 0.106,  $n<0.05= 5/7$ )]. From all the additional factors examined, only host status (i.e.,  
230 dead, alive) explained a significant amount of variance [PERMANOVA: Bray-Curtis, Host status:  
231  $R^2= 0.28$ ,  $F= 12.72$ ,  $P= 0.001$ , Louse sex:  $R^2= 0.08$ ,  $F= 0.9$ ,  $P= 0.554$ , Sequencing lane:  $R^2= 0.01$ ,  
232  $F= 0.38$ ,  $P= 0.878$ ; Jaccard, Host status:  $R^2= 0.13$ ,  $F= 4.93$ ,  $P= 0.002$ , Louse sex:  $R^2= 0.03$ ,  $F=$   
233  $0.28$ ,  $P= 0.867$ , Sequencing lane:  $R^2= 0$ ,  $F= -0.01$ ,  $P= 1$ ; Mantel test, locality, Bray-Curtis:  $\rho$  (min=  
234  $-0.09$ , max=  $-0.09$ , mean=  $-0.09$ ),  $P$  (min= 0.8749, max= 0.8867,  $n<0.05= 0/10$ ); Jaccard:  $\rho$  (min=  
235  $-0.29$ , max=  $-0.29$ , mean=  $-0.29$ ),  $P$  (min= 0.97742, max= 0.9777,  $n<0.05= 0/10$ )]. Including host  
236 status in PERMANOVA analyses did not alter the results on the major influence of host identity  
237 in explaining microbiome composition (PERMANOVA: Host identity, Bray-Curtis,  $R^2= 0.57$ ,  $F=$   
238  $4.58$ ,  $P= 0.001$ ; Jaccard,  $R^2= 0.71$ ,  $F= 5.09$ ,  $P= 0.002$ ).

239 Similarly, in Kaiju matrices collapsed at the species level, most (>80% in all cases) of the variance  
240 was also explained by infrapopulation identity (PERMANOVA: Bray–Curtis,  $R^2=0.804$ ,  $F=4.346$ ,  
241  $P=0.001$ , Fig 3b; Jaccard,  $R^2=0.803$ ,  $F=4.319$ ,  $P=0.001$ ; Fig S3b). Again, results from simulations

242 were similar [PERMANOVA: Bray-Curtis,  $R^2$  (min= 0.62, max= 0.88, mean= 0.75); P (min=  
243 0.003, max= 0.058,  $n < 0.05 = 9/10$ ); Jaccard,  $R^2$  (min= 0.63, max= 0.95, mean= 0.76), P (min=  
244 0.002, max= 0.09,  $n < 0.05 = 9/10$ )]. Of all the others factors examined, only host status explained  
245 a significant amount of variance [PERMANOVA: Bray-Curtis, Host-status:  $R^2 = 0.22$ ,  $F = 9.03$ ,  $P =$   
246 0.001, Louse sex:  $R^2 = 0.08$ ,  $F = 0.81$ ,  $P = 0.564$ , Sequencing lane:  $R^2 = 0.01$ ,  $F = 0.35$ ,  $P = 0.859$ ;  
247 Jaccard, Host-status:  $R^2 = 0.21$ ,  $F = 8.73$ ,  $P = 0.001$ , Louse sex:  $R^2 = 0.08$ ,  $F = 0.88$ ,  $P = 0.497$ ,  
248 Sequencing lane:  $R^2 = 0.01$ ,  $F = 0.4$ ,  $P = 0.825$ ; Mantel test, locality, Bray-Curtis:  $\rho$  (min= 0.04,  
249 max= 0.04, mean= 0.04), P (min= 0.5637, max= 0.5785,  $n < 0.05 = 0/10$ ); Jaccard:  $\rho$  (min= -0.03,  
250 max= -0.03, mean= -0.03), P (min= 0.5337, max= 0.5488,  $n < 0.05 = 0/10$ )]. PERMANOVA  
251 analysis accounting for host status did not alter the significance of host identity (PERMANOVA:  
252 Bray-Curtis,  $R^2 = 0.52$ ,  $F = 1.78$ ,  $P = 0.007$ ; Jaccard,  $R^2 = 0.59$ ,  $F = 3.37$ ,  $P = 0.001$ ).

253 Furthermore, results were consistent when using matrices collapsed at the genus level (>77% of  
254 variance explained in all cases) (PERMANOVA: Bray-Curtis,  $R^2 = 0.865$ ,  $F = 6.804$ ,  $P = 0.001$ , Fig  
255 S4a; Jaccard,  $R^2 = 0.774$ ,  $F = 3.634$ ,  $P = 0.001$ ; Fig S4b). Once again, results from simulations were  
256 similar [PERMANOVA: Bray-Curtis,  $R^2$  (min= 0.68, max= 0.96, mean= 0.8); P (min= 0.002,  
257 max= 0.073,  $n < 0.05 = 9/10$ ); Jaccard,  $R^2$  (min= 0.54, max= 0.86, mean= 0.73), P (min= 0.003,  
258 max= 0.061,  $n < 0.05 = 9/10$ )]. Additionally, of all the others factors examined, only host status  
259 explained a significant amount of variance [PERMANOVA: Bray-Curtis, Host-status:  $R^2 = 0.3$ ,  $F =$   
260 14,  $P = 0.001$ , Louse sex:  $R^2 = 0.05$ ,  $F = 0.51$ ,  $P = 0.851$ , Sequencing lane:  $R^2 = 0.01$ ,  $F = 0.39$ ,  $P =$   
261 0.753; Jaccard, Host-status:  $R^2 = 0.18$ ,  $F = 7.19$ ,  $P = 0.002$ , Louse sex:  $R^2 = 0.07$ ,  $F = 0.75$ ,  $P = 0.53$ ,  
262 Sequencing lane:  $R^2 = 0.01$ ,  $F = 0.40$ ,  $P = 0.75$ ; Mantel test, locality, Bray-Curtis:  $\rho$  (min= 0.09,  
263 max= 0.09, mean= 0.09), P (min= 0.7198, max= 0.7344,  $n < 0.05 = 0/10$ ); Jaccard:  $\rho$  (min= 0.02,  
264 max= 0.02, mean= 0.02), P (min= 0.4043, max= 0.4246,  $n < 0.05 = 0/10$ )]. Likewise,

265 PERMANOVA analysis accounting for host status did not alter the significance of host identity  
266 (PERMANOVA: Bray-Curtis,  $R^2=0.56$ ,  $F=4.73$ ,  $P=0.001$ ; Jaccard,  $R^2=0.59$ ,  $F=2.96$ ,  $P=0.001$ ).

## 267 **Discussion**

268 Two different metagenomic approaches support a major role of infrapopulation identity (ringed  
269 seal host individual) in explaining microbiome variation among individuals of the seal louse. In  
270 addition, highly similar results were found for approaches using either presence-absence or  
271 quantitative matrices, suggesting that not only is bacterial composition, but also bacterial  
272 abundance explained by infrapopulation identity. Our analyses were done on whole louse  
273 individuals and, thus, we cannot confidently differentiate between bacterial taxa inhabiting the lice  
274 (e.g., *Wolbachia* or *Hodgkinia*) from transient taxa present in the host blood meal (e.g.,  
275 *Chlamydia*). Nevertheless, in line with current evidence on the determinants of microbiome  
276 composition of bloodsucking parasites, the louse blood meal from individual seals is the most  
277 likely candidate in explaining the patterns of microbiome variation across the louse  
278 infrapopulations found here. Indeed, many of the taxa found in our analyses have already been  
279 found in other bloodsucking parasites, thus supporting the influence of blood in shaping the  
280 composition of parasite microbiomes studied here (Jiménez-Cortés et al. 2018).

281 However, other factors in addition to blood may have contributed to the similarity of microbiomes  
282 between individual lice from the same seal host individual. Some similarity may have arisen from  
283 shared environmental bacteria, those on the surface of the louse from a shared environment (skin  
284 and fur of the host), or contamination between louse individuals in screw-cap tubes, and not filtered  
285 by our decontamination procedures. There may also be insect-specific bacterial taxa, independent  
286 from the host blood, that are shared horizontally between individual lice from the same  
287 infrapopulation. Finally, louse infrapopulations are known to typically be highly inbred, with a

288 high level of relatedness between individuals (Koop et al. 2014, DiBlasi et al 2018, Virrueta  
289 Herrera et al., in prep.). It may be that there are louse genetic factors that interact with the  
290 microbiome to produce a specific composition (Blekhman et al. 2015; Dobson et al. 2015; Suzuki  
291 et al. 2019).

292 Our results are congruent with previous findings on the influence of host blood on microbiomes  
293 of bloodsucking parasites. Specifically, several studies have found a major role of the specific  
294 host species from which a blood meal is taken in shaping microbiomes of other bloodsucking  
295 organisms, such as ticks (*Ixodes scapularis*, *Ixodes pacificus*) and mosquitoes (*Aedes aegypti*)  
296 (Swei and Kwan 2017; Landesman et al. 2019; Muturi et al. 2019). Furthermore, Landesman et  
297 al. (2019) showed that microbiomes of deer tick (*Ixodes scapularis*) nymphs were largely  
298 explained by the individual hosts of the tick, a result similar to the one obtained here. Interestingly,  
299 in that study, the percentage of variation explained was considerably lower (45%) than that found  
300 here (>77%). It may be that differences in parasite ecology, such as the whether the parasite is a  
301 permanent or a recurrent feeder (as are both the case in sucking lice) may modulate the extent to  
302 which host blood shapes parasite microbiomes. The differences in the proportion of variance  
303 explained by infrapopulation identity between the two studies could also be due to differences in  
304 experimental design, such as the number of sampled infrapopulations (3 in ticks, and 17 in the seal  
305 lice here) and whether the sample design is balanced (i.e., the same number of individual parasites  
306 sampled per infrapopulation).

307 The knowledge that blood from the same individual seal host may influence the similarity of the  
308 microbiome of blood-feeding lice from that host can potentially provide new insights into the  
309 influence of host blood on such parasites. There are at least two not necessarily mutually exclusive  
310 processes that may explain the influence of a host individual's blood on louse microbiomes. First, the

311 blood from a particular host individual may contain a specific composition of bacterial loads that  
312 enter the louse on consumption of blood. Indeed, anopluran lice might have a higher likelihood  
313 of being colonized by bacteria from host blood because they do not possess a peritrophic  
314 membrane, an extracellular layer in the midgut that is composed of chitin, proteoglycans, and  
315 proteins, which in most other insects surrounds the ingested food bolus and separates the gut  
316 content, including bacteria, from the epithelium (Terra 2001; Waniek 2009). Indeed, the idea that  
317 a lack of a peritrophic membrane may facilitate colonization of blood-feeding parasites by bacteria  
318 present in the host blood has potentially also been supported by work on mouse fleas  
319 (*Rhadinopsylla dahurica*), which also lack this membrane (Li et al. 2018). In this case, there was  
320 evidence of homogenization (i.e., similar bacterial communities) between the host blood and the  
321 parasite (whole flea individuals). The lack of a peritrophic membrane is often associated with  
322 permanent parasites, such as blood-feeding lice, for which the continual availability of food means  
323 that there is less selection for efficiency of digestion. Therefore, the presence versus absence of a  
324 peritrophic membrane may explain the differences between lice and ticks (of which the latter  
325 possess a peritrophic membrane) with regards to the influence of host blood on the composition of  
326 the parasite microbiome.

327 A second possibility that could explain why host blood may influence louse microbiome  
328 composition is that the conditions during blood digestion may alter bacterial taxa that were already  
329 present in the louse. The specifics of blood digestion may have an individual host-specific  
330 signature. Specifically, catabolism of blood meal leads to the generation of reactive oxygen  
331 species that are known to alter the midgut bacterial composition and diversity of bloodsucking  
332 parasites (Souza et al. 1997; Wang et al. 2011; Muturi et al. 2019). Also, the blood meals of  
333 different host species are also known to differ in composition (e.g., total protein, hemoglobin, and

334 hematocrit content), and these differences may lead to a differential proliferation of microbial taxa  
335 during digestion by the parasite (Souza et al. 1997; Wang et al. 2011; Muturi et al. 2019). It may  
336 be the case that differences in blood composition among individuals even within the same host  
337 species may be shaping the bacterial composition of lice in a manner that is specific to host  
338 individuals.

339 Bloodsucking organisms, and anopluran lice in particular, are well known to rely on mutualistic  
340 endosymbionts to complement deficiencies in their diet (Perotti et al. 2008; Boyd and Reed 2012;  
341 Boyd et al. 2017; Jiménez-Cortés et al. 2018). Notwithstanding that several of the bacterial taxa  
342 we found may not be stable inhabitants of lice, we did find evidence for the presence of several  
343 louse-specific bacterial taxa. These include the obligate intracellular arthropod bacteria *Wolbachia*  
344 (Werren 1997) and *Hodgkinia* (for which only endosymbionts of *Cicadas* are known; McCutcheon  
345 et al. 2009). Accordingly, we explored our MAGs for genome characteristics typical of  
346 endosymbionts. In particular, because endosymbiont genomes typically are small and have an AT  
347 bias, we explored the relative position of the observed MAGs in a "Genome size ~ GC content"  
348 correlation plot (Wernegreen 2015; Figure 4). Bin 1 appears to be the best candidate to be a  
349 mutualistic endosymbiont, according to its relative position in the correlation plot. This MAG was  
350 100% complete (according to CheckM; Parks et al. 2015), detected in most samples (prevalence =  
351 71%), and classified with confidence as Flavobacteriaceae. MiGA analyses suggest it may even  
352 belong to *Chryseobacterium* (p-value 0.585). Endosymbionts belonging to *Chryseobacterium* are  
353 known in other arthropods (e.g., termites, mosquitoes, cockroaches, and ticks; Eutick et al. 1978;  
354 Dugas et al. 2001; Campbell et al. 2004; Montasser 2005; Burešová et al. 2006). Additionally, we  
355 conducted a preliminary investigation of the metabolic capabilities of this bacterium by  
356 investigating the completeness of metabolic pathways using GhostKOALA (Kanehisa et al. 2016)



357 and KEGG-Decoder (Graham et al. 2018). This MAG has complete routes for synthesis of vitamin  
358 B (riboflavin), an essential amino acid (lysine), and several non-essential amino acids (e.g., serine;  
359 see Table S4), as well as many fully or partially missing routes that may be redundant or potentially  
360 shared (or synthesized along) with the louse (Table S4).

361 Overall, these results are congruent with what has been found for endosymbionts of bloodsucking  
362 parasites (Moriyama et al. 2015; Boyd et al. 2016; Santos-Garcia et al. 2017; Duron et al. 2018).  
363 Another anopluran pinniped louse (*Proechinophthirus fluctus*) has been found to have a *Sodalis*  
364 endosymbiont (Boyd et al. 2016), but we found no evidence of *Sodalis* in *Echinophthirus*  
365 *horridus*. Other species of Anoplura have yet other endosymbionts (Boyd et al. 2017, Rihová et  
366 al. 2017), suggesting that endosymbiont replacement is an ongoing and relatively common process  
367 within the order. Further research, including phylogenomic studies improving the phylogenetic  
368 placement of this potentially mutualistic bacterium and studies using fluorescence in situ  
369 hybridization (FISH) to ascertain the location of this bacterium in louse individuals, is needed to  
370 get deeper insight into the interaction of this bacterium with *E. horridus*.

371 Finally, at a broader scale, our results are congruent with previous studies that have found a major  
372 role of different levels of subdivision in shaping microbiomes in a wide range of systems. For  
373 instance, population identity has been found to largely explain microbiome composition of great  
374 apes (Campbell et al. 2020), American pikas (*Ochotona princeps*) (Kohl et al. 2018), and humans  
375 (Rothschild et al. 2018). Similar results have also been found across subdivision levels other than  
376 populations, such as ecotypes (human lice *Pediculus humanus*; Agany et al. 2020), or by spatial  
377 proximity (North American moose *Alces alces*; Fountain-Jones et al. 2020). On the other hand,  
378 while the influence of subdivision on microbiome composition is widely supported, much less is  
379 known about whether signs of phylosymbiosis can be found at these levels. Kohl et al. (2018)

380 found that populations largely explained microbiome variation in American pikas along with a  
381 phylosymbiotic pattern (i.e., closely related hosts had similar microbial communities).  
382 Interestingly, while we did not investigate the presence of phylosymbiosis here, our results suggest  
383 that a phylosymbiotic pattern is not always found at an intraspecific level. For instance, this may  
384 be the case of subdivided systems in which the food source (which allows the dispersal of microbes  
385 from one organism to another) constitutes the main determinant of microbiome composition, and  
386 populations are not necessarily composed of closely related organisms. However, phylosymbiotic  
387 patterns across species have been found in relatively similar systems. Therefore, bacterial  
388 dispersal, ecological drift, diversification, or microbe-microbe interactions may be the main factors  
389 explaining phylosymbiosis in these systems. More studies on the origin and prevalence of  
390 phylosymbiotic patterns within and across species are clearly needed.

391

392 **Acknowledgments:** We thank all researchers and students for collecting the lice analyzed in this  
393 study. Especially, we would like to thank researchers Miina Auttila, Vincent Biard, Meeri  
394 Koivuniemi, Lauri Liukkonen, Marja Niemi, Sari Oksanen, Mia Valtonen, and Eeva Ylinen for  
395 keeping eye on the lice during their own studies.

396 **Author contributions:** J.D., S.V.H, and K.P.J. conceived the study. T.N. and M.K. obtained  
397 samples. S.V.H. and K.P.J. collected the data. J.D. analyzed the data. T.N., M.V., and K.P.J.  
398 obtained financial support for the project. J.D. wrote the manuscript and all authors contributed  
399 to editing the manuscript.

400 **Funding:** This study was supported by the US National Science Foundation (DEB-1239788,  
401 DEB-1342604, and DEB-1926919 to K.P.J). Sequencing costs were supported by grants from

402 the Oskar Öflund Foundation, the Betty Väänänen Foundation, Societas Pro Fauna et Flora  
403 Fennica, and the Nestori Foundation.

404 **Availability of data and material:** Raw sequence reads for all samples are available under  
405 (NCBI) project *ACCESSION CODE*. Metagenomic assemblies are available at Figshare (doi:  
406 10.6084/m9.figshare.12366575 —private link for review:  
407 <https://figshare.com/s/171207f7fb73f7d290a6>). Metagenomic assemblies are also available from  
408 NCBI Genome (*ACCESSION CODES*).

409 **Ethics approval and consent to participate:** Telemetry studies have been approved by the local  
410 environmental authority Centre for Economic Development, Transport and the Environment  
411 (permit numbers: ESAELY/433/ 07.01/2012 and ESA-2008-L-519-254) and the Animal  
412 Experiment Board in Finland (permit numbers: ESAVI/ 8269/04.10.07/2013 and ESAVI-2010-  
413 08380/Ym-23).

414 **Competing interests:** The authors declare that they have no competing interests.

415

## 416 References:

- 417 Adair, K. L., and A. E. Douglas. (2017). Making a microbiome: the many determinants of host-  
418 associated microbial community composition. *Current Opinion in Microbiology*, 35, 23–  
419 29.
- 420 Agany, D. D. M., R. Potts, J. L. Gonzalez Hernandez, E. Z. Gnimpieba, and J. E. Pietri. (2020).  
421 Microbiome Differences between Human Head and Body Lice Ecotypes Revealed by  
422 16S rRNA Gene Amplicon Sequencing. *Journal of Parasitology*, 106, 14.
- 423 Alneberg, J., B. S. Bjarnason, I. de Bruijn, M. Schirmer, J. Quick, U. Z. Ijaz, L. Lahti, N. J.  
424 Loman, A. F. Andersson, and C. Quince. (2014). Binning metagenomic contigs by  
425 coverage and composition. *Nature Methods*, 11, 1144–1146.
- 426 Anderson, M. J. (2014). Permutational multivariate analysis of variance (PERMANOVA). *Wiley*  
427 *statsref: statistics reference online*, 1–15.
- 428 Anderson, M. J., and D. C. Walsh. (2013). PERMANOVA, ANOSIM, and the Mantel test in the  
429 face of heterogeneous dispersions: what null hypothesis are you testing? *Ecological*  
430 *Monographs*, 83, 557–574.
- 431 Auguie, B. (2016). gridExtra: Miscellaneous functions for “Grid” graphics. R package version  
432 2.3. URL <https://CRAN.R-project.org/package=gridExtra>.
- 433 Blekhman, R., J. K. Goodrich, K. Huang, Q. Sun, R. Bukowski, J. T. Bell, T. D. Spector, A.  
434 Keinan, R. E. Ley, D. Gevers, and A. G. Clark. (2015). Host genetic variation impacts  
435 microbiome composition across human body sites. *Genome Biology*, 16, 191.
- 436 Bowers, R. M., N. C. Kyrpides, R. Stepanauskas, M. Harmon-Smith, D. Doud, T. B. K. Reddy,  
437 F. Schulz, J. Jarett, A. R. Rivers, E. A. Elloe-Fadrosh, S. G. Tringe, N. N. Ivanova, A.  
438 Copeland, A. Clum, E. D. Becraft, R. R. Malmstrom, B. Birren, M. Podar, P. Bork, G. M.  
439 Weinstock, G. M. Garrity, J. A. Dodsworth, S. Yooseph, G. Sutton, F. O. Glöckner, J. A.  
440 Gilbert, W. C. Nelson, S. J. Hallam, S. P. Jungbluth, T. J. G. Ettema, S. Tighe, K. T.  
441 Konstantinidis, W.-T. Liu, B. J. Baker, T. Rattei, J. A. Eisen, B. Hedlund, K. D.  
442 McMahan, N. Fierer, R. Knight, R. Finn, G. Cochrane, I. Karsch-Mizrachi, G. W. Tyson,  
443 C. Rinke, A. Lapidus, F. Meyer, P. Yilmaz, D. H. Parks, A. M. Eren, L. Schriml, J. F.  
444 Banfield, P. Hugenholtz, and T. Woyke. (2017). Minimum information about a single  
445 amplified genome (MISAG) and a metagenome-assembled genome (MIMAG) of  
446 bacteria and archaea. *Nature Biotechnology*, 35, 725–731.
- 447 Boyd, B. M., J. M. Allen, R. Koga, T. Fukatsu, A. D. Sweet, K. P. Johnson, and D. L. Reed.  
448 (2016). Two Bacterial Genera, *Sodalis* and *Rickettsia*, Associated with the Seal Louse  
449 *Proechinophthirus fluctus* (Phthiraptera: Anoplura). *Applied and Environmental*  
450 *Microbiology*, 82, 3185–3197.
- 451 Boyd, B. M., J. M. Allen, N.-P. Nguyen, P. Vachaspati, Z. S. Quicksall, T. Warnow, L. Mugisha,  
452 K. P. Johnson, and D. L. Reed. (2017). Primates, Lice and Bacteria: Speciation and  
453 Genome Evolution in the Symbionts of Hominid Lice. *Molecular Biology and Evolution*,  
454 34, 1743–1757.
- 455 Boyd, B. M., and D. L. Reed. (2012). Taxonomy of lice and their endosymbiotic bacteria in the  
456 post-genomic era. *Clinical Microbiology and Infection*, 18, 324–331.
- 457 Brooks, A. W., K. D. Kohl, R. M. Brucker, E. J. van Opstal, and S. R. Bordenstein. (2016).  
458 Phyllosymbiosis: Relationships and Functional Effects of Microbial Communities across  
459 Host Evolutionary History. *PLoS Biology*, 14, e2000225.
- 460 Brucker, R. M., and S. R. Bordenstein. (2013). The Hologenomic Basis of Speciation: Gut

- 461 Bacteria Cause Hybrid Lethality in the Genus *Nasonia*. *Science*, 341, 667–669.
- 462 Burešová, V., Z. Franta, and P. Kopáček. (2006). A comparison of *Chryseobacterium*  
463 *indologenes* pathogenicity to the soft tick *Ornithodoros moubata* and hard tick *Ixodes*  
464 *ricinus*. *Journal of Invertebrate Pathology*, 93, 96–104.
- 465 Campbell, C. L., D. L. Mummey, E. T. Schmidtman, and W. C. Wilson. (2004). Culture-  
466 independent analysis of midgut microbiota in the arbovirus vector *Culicoides sonorensis*  
467 (Diptera: Ceratopogonidae). *Journal of Medical Entomology*, 41, 340–348.
- 468 Campbell, T. P., X. Sun, V. H. Patel, C. Sanz, D. Morgan, and G. Dantas. (2020). The  
469 microbiome and resistome of chimpanzees, gorillas, and humans across host lifestyle and  
470 geography. *ISME Journal*, 1–16.
- 471 Clemente, J. C., L. K. Ursell, L. W. Parfrey, and R. Knight. (2012). The impact of the gut  
472 microbiota on human health: an integrative view. *Cell*, 148, 1258–1270.
- 473 Davis, N. M., D. M. Proctor, S. P. Holmes, D. A. Relman, and B. J. Callahan. (2018). Simple  
474 statistical identification and removal of contaminant sequences in marker-gene and  
475 metagenomics data. *Microbiome*, 6, 226.
- 476 Díaz-Sánchez, S., A. Estrada-Peña, A. Cabezas-Cruz, and J. de la Fuente. (2019). Evolutionary  
477 Insights into the Tick Hologenome. *Trends in Parasitology*, 35, 725–737.
- 478 Dobson, A. J., J. M. Chaston, P. D. Newell, L. Donahue, S. L. Hermann, D. R. Sannino, S.  
479 Westmiller, A. C.-N. Wong, A. G. Clark, and B. P. Lazzaro. (2015). Host genetic  
480 determinants of microbiota-dependent nutrition revealed by genome-wide analysis of  
481 *Drosophila melanogaster*. *Nature Communications*, 6, 1–9.
- 482 Dröge, J., I. Gregor, and A. C. McHardy. (2015). Taxator-tk: precise taxonomic assignment of  
483 metagenomes by fast approximation of evolutionary neighborhoods. *Bioinformatics*, 31,  
484 817–824.
- 485 Dugas, J. E., L. Zurek, B. J. Paster, B. A. Keddie, and E. R. Leadbetter. (2001). Isolation and  
486 characterization of a *Chryseobacterium* strain from the gut of the American cockroach,  
487 *Periplaneta americana*. *Archives of Microbiology*, 175, 259–262.
- 488 Durden, L. A., and G. G. Musser. (1994). The mammalian hosts of the sucking lice (Anoplura)  
489 of the world: a host-parasite list. *Journal of Vector Ecology*, 19, 130–168.
- 490 Duron, O., O. Morel, V. Noël, M. Buysse, F. Binetruy, R. Lancelot, E. Loire, C. Ménard, O.  
491 Bouchez, F. Vavre, and L. Vial. (2018). Tick-Bacteria Mutualism Depends on B Vitamin  
492 Synthesis Pathways. *Current Biology*, 28, 1896-1902.e5.
- 493 Eutick, M. L., R. W. O'Brien, and M. Slaytor. (1978). Bacteria from the gut of Australian  
494 termites. *Applied and Environmental Microbiology*, 35, 823–828.
- 495 Fountain-Jones, N. M., N. J. Clark, A. C. Kinsley, M. Carstensen, J. Forester, T. J. Johnson, E.  
496 A. Miller, S. Moore, T. M. Wolf, and M. E. Craft. (2020). Microbial associations and  
497 spatial proximity predict North American moose (*Alces alces*) gastrointestinal  
498 community composition. *Journal of Animal Ecology*, 89, 817–828.
- 499 Graham, E. D., J. F. Heidelberg, and B. J. Tully. (2018). Potential for primary productivity in a  
500 globally-distributed bacterial phototroph. *ISME Journal*, 12, 1861–1866.
- 501 Hassani, M. A., P. Durán, and S. Hacquard. (2018). Microbial interactions within the plant  
502 holobiont. *Microbiome*, 6, 58.
- 503 Hooper, R., J. C. Brealey, T. van der Valk, A. Alberdi, J. W. Durban, H. Fearnbach, K. M.  
504 Robertson, R. W. Baird, M. B. Hanson, P. Wade, M. T. P. Gilbert, P. A. Morin, J. B. W.  
505 Wolf, A. D. Foote, and K. Guschanski. (2019). Host-derived population genomics data  
506 provides insights into bacterial and diatom composition of the killer whale skin.

- 507 *Molecular Ecology*, 28, 484–502.
- 508 Jackman, S. D., B. P. Vandervalk, H. Mohamadi, J. Chu, S. Yeo, S. A. Hammond, G. Jahesh, H.  
509 Khan, L. Coombe, R. L. Warren, and I. Birol. (2017). ABySS 2.0: resource-efficient  
510 assembly of large genomes using a Bloom filter. *Genome Research*, 27, 768–777.
- 511 Jervis-Bardy, J., L. E. Leong, S. Marri, R. J. Smith, J. M. Choo, H. C. Smith-Vaughan, E.  
512 Nosworthy, P. S. Morris, S. O’Leary, and G. B. Rogers. (2015). Deriving accurate  
513 microbiota profiles from human samples with low bacterial content through post-  
514 sequencing processing of Illumina MiSeq data. *Microbiome*, 3, 19. Springer.
- 515 Jiménez-Cortés, J. G., R. García-Contreras, M. I. Bucio-Torres, M. Cabrera-Bravo, A. Córdoba-  
516 Aguilar, G. Benelli, and P. M. Salazar-Schettino. (2018). Bacterial symbionts in human  
517 blood-feeding arthropods: Patterns, general mechanisms and effects of global ecological  
518 changes. *Acta Tropica*, 186, 69–101.
- 519 Kanehisa, M., Y. Sato, and K. Morishima. (2016). BlastKOALA and GhostKOALA: KEGG  
520 tools for functional characterization of genome and metagenome sequences. *Journal of*  
521 *Molecular Biology*, 428, 726–731.
- 522 Kang, D. D., F. Li, E. Kirton, A. Thomas, R. Egan, H. An, and Z. Wang. (2019). MetaBAT 2: an  
523 adaptive binning algorithm for robust and efficient genome reconstruction from  
524 metagenome assemblies. *PeerJ*, 7:e7359.
- 525 Kassambara, A. (2018). Package ‘ggpubr’: ‘ggplot2’ based publication ready plots. Version 0.2.  
526 See [https://rpkgs. datanovia. com/ggpubr/index. html](https://rpkgs.datanovia.com/ggpubr/index.html).
- 527 Kelly, B. J., Gross, R., Bittinger, K., Sherrill-Mix, S., Lewis, J. D., Collman, R. G., ... & Li, H.  
528 (2015). Power and sample-size estimation for microbiome studies using pairwise  
529 distances and PERMANOVA. *Bioinformatics*, 31, 2461-2468.
- 530 Kim, K. C. (1985). Coevolution of Parasitic Arthropods and Mammals. Wiley.
- 531 Kim, K. C. (1975). Specific antiquity of the sucking lice and evolution of otariid seals. *Rapports*  
532 *et procès-verbaux des réunions*, 169, 544–549.
- 533 Kim, K. C. (1971). The Sucking Lice (Anoplura: Echinophthiriidae) of the Northern Fur Seal;  
534 Descriptions and Morphological Adaptation. *Annals of the Entomological Society of*  
535 *America*, 64, 280–292
- 536 Knowles, S. C. L., Eccles, R. M., & Baltrūnaitė, L. (2019). Species identity dominates over  
537 environment in shaping the microbiota of small mammals. *Ecology Letters*, 22, 826-837.
- 538 Kohl, K. D. (2020). Ecological and evolutionary mechanisms underlying patterns of  
539 phyllosymbiosis in host-associated microbial communities. *Philosophical Transactions of*  
540 *the Royal Society of London B Biological Sciences*, 375, 20190251.
- 541 Kohl, K. D., J. Varner, J. L. Wilkening, and M. D. Dearing. (2018). Gut microbial communities  
542 of American pikas (*Ochotona princeps*): Evidence for phyllosymbiosis and adaptations to  
543 novel diets. *Journal of Animal Ecology*, 87, 323–330.
- 544 Laetsch, D. R., and M. L. Blaxter. (2017). BlobTools: Interrogation of genome assemblies.  
545 *F1000Research*, 6, 1287.
- 546 Landesman, W. J., K. Mulder, B. F. Allan, L. A. Bashor, F. Keesing, K. LoGiudice, and R. S.  
547 Ostfeld. (2019). Potential effects of blood meal host on bacterial community composition  
548 in *Ixodes scapularis* nymphs. *Ticks and Tick-Borne Diseases*, 10, 523–527.
- 549 Lankau, E. W., P.-Y. Hong, and R. I. Mackie. (2012). Ecological drift and local exposures drive  
550 enteric bacterial community differences within species of Galapagos iguanas. *Molecular*  
551 *Ecology*, 21, 1779–1788.
- 552 Le Chatelier, E., T. Nielsen, J. Qin, E. Prifti, F. Hildebrand, G. Falony, M. Almeida, M.

- 553 Arumugam, J.-M. Batto, S. Kennedy, P. Leonard, J. Li, K. Burgdorf, N. Grarup, T.  
554 Jørgensen, I. Brandslund, H. B. Nielsen, A. S. Juncker, M. Bertalan, F. Levenez, N. Pons,  
555 S. Rasmussen, S. Sunagawa, J. Tap, S. Tims, E. G. Zoetendal, S. Brunak, K. Clément, J.  
556 Doré, M. Kleerebezem, K. Kristiansen, P. Renault, T. Sicheritz-Ponten, W. M. de Vos, J.-  
557 D. Zucker, J. Raes, T. Hansen, P. Bork, J. Wang, S. D. Ehrlich, and O. Pedersen. (2013).  
558 Richness of human gut microbiome correlates with metabolic markers. *Nature*, 500, 541–  
559 546.
- 560 Lee, S., J. Y. Kim, M. Yi, I.-Y. Lee, R. Fyumagwa, and T.-S. Yong. (2019). Comparative  
561 microbiomes of ticks collected from a black rhino and its surrounding environment.  
562 *International Journal of Parasitology Parasites and Wildlife*, 9, 239–243.
- 563 Leonardi, M. S., E. A. Crespo, J. A. Raga, and F. J. Aznar. (2013). Lousy mums: patterns of  
564 vertical transmission of an amphibious louse. *Parasitology Research*, 112, 3315–3323.  
565 Springer.
- 566 Leonardi, M. S., S. V. Herrera, A. Sweet, J. Negrete, and K. P. Johnson. (2019). Phylogenomic  
567 analysis of seal lice reveals codivergence with their hosts. *Systematic Entomology*, 44,  
568 699–708.
- 569 Li, H., T. Li, and J. Qu. (2018). Stochastic processes govern bacterial communities from the  
570 blood of pikas and from their arthropod vectors. *FEMS Microbiology Ecology*, 94.
- 571 Lim, S. J., and S. R. Bordenstein. (2020). An introduction to phyllosymbiosis. *Proceedings of the*  
572 *Royal Society B: Biological Sciences*, 287, 20192900.
- 573 Lusk, R. W. (2014). Diverse and widespread contamination evident in the unmapped depths of  
574 high throughput sequencing data. *PloS One*, 9.
- 575 Lutz, H. L., E. W. Jackson, P. W. Webala, W. S. Babyesiza, J. C. Kerbis Peterhans, T. C.  
576 Demos, B. D. Patterson, and J. A. Gilbert. (2019). Ecology and Host Identity Outweigh  
577 Evolutionary History in Shaping the Bat Microbiome. *mSystems*, 4.
- 578 Mazel, F., K. M. Davis, A. Loudon, W. K. Kwong, M. Groussin, and L. W. Parfrey. (2018). Is  
579 Host Filtering the Main Driver of Phyllosymbiosis across the Tree of Life? *mSystems*, 3.
- 580 McArdle, A. J., and M. Kaforou. (2020). Sensitivity of shotgun metagenomics to host DNA:  
581 abundance estimates depend on bioinformatic tools and contamination is the main issue.  
582 *Access Microbiology*, doi: 10.1099/acmi.0.000104.
- 583 McCutcheon, J. P., B. R. McDonald, and N. A. Moran. 2009. Origin of an Alternative Genetic  
584 Code in the Extremely Small and GC-Rich Genome of a Bacterial Symbiont. *PLoS*  
585 *Genetics*, 5, e1000565.
- 586 McMurdie, P. J., and S. Holmes. (2013). phyloseq: an R package for reproducible interactive  
587 analysis and graphics of microbiome census data. *PloS One*, 8.
- 588 Menzel, P., K. L. Ng, and A. Krogh. (2016). Fast and sensitive taxonomic classification for  
589 metagenomics with Kaiju. *Nature Communications*, 7, 1–9.
- 590 Montasser, A. A. (2005). Gram-negative bacteria from the camel tick *Hyalomma dromedarii*  
591 (Ixodidae) and the chicken tick *Argas persicus* (Argasidae) and their antibiotic  
592 sensitivities. *Journal of the Egyptian Society of Parasitology*, 35, 95–106.
- 593 Moriyama, M., N. Nikoh, T. Hosokawa, and T. Fukatsu. (2015). Riboflavin Provisioning  
594 Underlies *Wolbachia*'s Fitness Contribution to Its Insect Host. *mBio*, 6.
- 595 Muturi, E. J., C. Dunlap, J. L. Ramirez, A. P. Rooney, and C.-H. Kim. (2019). Host blood-meal  
596 source has a strong impact on gut microbiota of *Aedes aegypti*. *FEMS Microbiology*  
597 *Ecology*, 95.

- 598 Niemi, M., Liukkonen, L., Koivuniemi, M., Auttila, M., Rautio, A., & Kunnasranta, M. (2019).  
599 Winter behavior of Saimaa ringed seals: Non-overlapping core areas as indicators of  
600 avoidance in breeding females. *PloS one*, 14, 1.
- 601 Nishida, A. H., and H. Ochman. (2018). Rates of gut microbiome divergence in mammals.  
602 *Molecular Ecology*, 27, 1884–1897.
- 603 Nurk, S., D. Meleshko, A. Korobeynikov, and P. A. Pevzner. (2017). metaSPAdes: a new  
604 versatile metagenomic assembler. *Genome Research*, 27, 824–834.
- 605 Nyman, T., Valtonen, M., Aspi, J., Ruokonen, M., Kunnasranta, M. & Palo, J. U. (2014).  
606 Demographic histories and genetic diversities of Fennoscandian marine and landlocked  
607 ringed seal subspecies. *Ecology and Evolution*, 4, 3420–3434.
- 608 Oksanen, J., F. G. Blanchet, R. Kindt, P. Legendre, R. B. O’hara, G. L. Simpson, P. Solymos, M.  
609 H. H. Stevens, and H. Wagner. (2019). Vegan: community ecology package. R package  
610 version 2.5-4.
- 611 Osei-Poku, J., C. M. Mbogo, W. J. Palmer, and F. M. Jiggins. (2012). Deep sequencing reveals  
612 extensive variation in the gut microbiota of wild mosquitoes from Kenya. *Molecular*  
613 *Ecology*, 21, 5138–5150.
- 614 Parks, D. H., M. Imelfort, C. T. Skennerton, P. Hugenholtz, and G. W. Tyson. (2015). CheckM:  
615 assessing the quality of microbial genomes recovered from isolates, single cells, and  
616 metagenomes. *Genome Research*, 25, 1043–1055.
- 617 Patro, R., G. Duggal, M. I. Love, R. A. Irizarry, and C. Kingsford. (2017). Salmon provides fast  
618 and bias-aware quantification of transcript expression. *Nature Methods*, 14, 417.
- 619 Perotti, M. A., E. F. Kirkness, D. L. Reed, and H. R. Braig. (2008). Endosymbionts of lice. Pp.  
620 223–238 in *Insect Symbiosis*, Volume 3. CRC Press.
- 621 R Core Team. (2019). R: A language and environment for statistical computing.
- 622 Rodriguez-R, L. M., S. Gunturu, W. T. Harvey, R. Rosselló-Mora, J. M. Tiedje, J. R. Cole, and  
623 K. T. Konstantinidis. (2018). The Microbial Genomes Atlas (MiGA) webserver:  
624 taxonomic and gene diversity analysis of Archaea and Bacteria at the whole genome  
625 level. *Nucleic Acids Research*, 46, W282–W288.
- 626 Rothschild, D., O. Weissbrod, E. Barkan, A. Kurilshikov, T. Korem, D. Zeevi, P. I. Costea, A.  
627 Godneva, I. N. Kalka, N. Bar, S. Shilo, D. Lador, A. V. Vila, N. Zmora, M. Pevsner-  
628 Fischer, D. Israeli, N. Kosower, G. Malka, B. C. Wolf, T. Avnit-Sagi, M. Lotan-Pompan,  
629 A. Weinberger, Z. Halpern, S. Carmi, J. Fu, C. Wijmenga, A. Zhernakova, E. Elinav, and  
630 E. Segal. (2018) Environment dominates over host genetics in shaping human gut  
631 microbiota. *Nature*, 555, 210–215.
- 632 Rudman, S. M., S. Greenblum, R. C. Hughes, S. Rajpurohit, O. Kiratli, D. B. Lowder, S. G.  
633 Lemmon, D. A. Petrov, J. M. Chaston, and P. Schmidt. (2019). Microbiome composition  
634 shapes rapid genomic adaptation of *Drosophila melanogaster*. *Proceedings of the*  
635 *National Academy of Sciences USA*, 116, 20025–20032.
- 636 Salter, S. J., M. J. Cox, E. M. Turek, S. T. Calus, W. O. Cookson, M. F. Moffatt, P. Turner, J.  
637 Parkhill, N. J. Loman, and A. W. Walker. (2014). Reagent and laboratory contamination  
638 can critically impact sequence-based microbiome analyses. *BMC Biology*, 12, 87.  
639 Springer.
- 640 Santos-Garcia, D., F. J. Silva, S. Morin, K. Dettner, and S. M. Kuechler. (2017). The All-  
641 Rounder Sodalis: A New Bacteriome-Associated Endosymbiont of the Lygaeoid Bug  
642 *Henestaris halophilus* (Heteroptera: Henestarinae) and a Critical Examination of Its  
643 Evolution. *Genome Biology and Evolution*, 9, 2893–2910.



- 644 Slowikowski, K., A. Schep, S. Hughes, S. Lukauskas, J. O. Irisson, and Z. N. Kamvar. (2019).  
645 ggrepel: automatically position non-overlapping text labels with ‘ggplot2’2018. URL  
646 <https://CRAN.R-project.org/package=ggrepel>. R package version 0.8. 0.
- 647 Snodgrass, R. E. (1944). The feeding apparatus of biting and sucking insects affecting man and  
648 animals. *Smithsonian Miscellaneous Collections*.
- 649 Song, S. J., J. G. Sanders, F. Delsuc, J. Metcalf, K. Amato, M. W. Taylor, F. Mazel, H. L. Lutz,  
650 K. Winker, G. R. Graves, G. Humphrey, J. A. Gilbert, S. J. Hackett, K. P. White, H. R.  
651 Skeen, S. M. Kurtis, J. Withrow, T. Braile, M. Miller, K. G. McCracken, J. M. Maley, V.  
652 O. Ezenwa, A. Williams, J. M. Blanton, V. J. McKenzie, and R. Knight. (2020).  
653 Comparative Analyses of Vertebrate Gut Microbiomes Reveal Convergence between  
654 Birds and Bats. *mBio*, 11.
- 655 Souza, A. V. G., J. H. Petretski, M. Demasi, E. J. H. Bechara, and P. L. Oliveira. (1997). Urate  
656 protects a blood-sucking insect against hemin-induced oxidative stress. *Free Radical*  
657 *Biology & Medicine*, 22, 209–214.
- 658 Suzuki, T. A., M. Phifer-Rixey, K. L. Mack, M. J. Sheehan, D. Lin, K. Bi, and M. W. Nachman.  
659 (2019). Host genetic determinants of the gut microbiota of wild mice. *Molecular*  
660 *Ecology*, 28, 3197–3207.
- 661 Swei, A., and J. Y. Kwan. (2017). Tick microbiome and pathogen acquisition altered by host  
662 blood meal. *ISME Journal*, 11, 813–816.
- 663 Terra, W. R. (2001). The origin and functions of the insect peritrophic membrane and peritrophic  
664 gel. *Archives of Insect Biochemistry and Physiology*, 47, 47–61.
- 665 Uritskiy, G. V., J. DiRuggiero, and J. Taylor. (2018). MetaWRAP—a flexible pipeline for  
666 genome-resolved metagenomic data analysis. *Microbiome*, 6, 158.
- 667 Velazquez, E. M., H. Nguyen, K. T. Heasley, C. H. Saechao, L. M. Gil, A. W. L. Rogers, B. M.  
668 Miller, M. R. Rolston, C. A. Lopez, Y. Litvak, M. J. Liou, F. Faber, D. N. Bronner, C. R.  
669 Tiffany, M. X. Byndloss, A. J. Byndloss, and A. J. Bäumlner. (2019). Endogenous  
670 Enterobacteriaceae underlie variation in susceptibility to Salmonella infection. *Nature*  
671 *Microbiology*, 4, 1057–1064.
- 672 Wang, Y., T. M. G. Iii, P. Kukutla, G. Yan, and J. Xu. (2011). Dynamic Gut Microbiome across  
673 Life History of the Malaria Mosquito *Anopheles gambiae* in Kenya. *PloS One*, 6, e24767.
- 674 Waniek, P. J. (2009). The digestive system of human lice: current advances and potential  
675 applications. *Physiological Entomology*, 34, 203–210.
- 676 Weiss, S., Z. Z. Xu, S. Peddada, A. Amir, K. Bittinger, A. Gonzalez, C. Lozupone, J. R.  
677 Zaneveld, Y. Vázquez-Baeza, A. Birmingham, E. R. Hyde, and R. Knight. (2017).  
678 Normalization and microbial differential abundance strategies depend upon data  
679 characteristics. *Microbiome*, 5, 27.
- 680 Wernegreen, J. J. (2015). Endosymbiont evolution: Predictions from theory and surprises from  
681 genomes. *Annals of the New York Academy of Sciences*, 1360, 16–35.
- 682 Werren, J. H. (1997). Biology of wolbachia. *Annual Review of Entomology*, 42, 587–609.
- 683 Wickham, H. (2016). ggplot2: elegant graphics for data analysis. Springer.
- 684 Willner, D., J. Daly, D. Whiley, K. Grimwood, C. E. Wainwright, and P. Hugenholtz. (2012).  
685 Comparison of DNA extraction methods for microbial community profiling with an  
686 application to pediatric bronchoalveolar lavage samples. *PloS One*, 7.
- 687 Wu, Y.-W., B. A. Simmons, and S. W. Singer. (2016). MaxBin 2.0: an automated binning  
688 algorithm to recover genomes from multiple metagenomic datasets. *Bioinformatics*, 32,  
689 605–607.

- 690 Xiao, N. (2018). ggsci: scientific journal and sci-fi themed color palettes for ‘ggplot2’. R  
691 package version 2.9.
- 692 Zhang, X.-C., Z.-N. Yang, B. Lu, X.-F. Ma, C.-X. Zhang, and H.-J. Xu. (2014). The composition  
693 and transmission of microbiome in hard tick, *Ixodes persulcatus*, during blood meal.  
694 *Ticks and Tick-Borne Diseases*, 5, 864–870.
- 695 Zolnik, C. P., R. C. Falco, T. J. Daniels, and S.-O. Kolokotronis. (2018). Transient influence of  
696 blood meal and natural environment on blacklegged tick bacterial communities. *Ticks*  
697 *and Tick-Borne Diseases*, 9, 563–572.
- 698

699 **Figure and table legend:**

700 **Table 1.** Statistics of the MAGs assembled. MAG name indicates the name given to that bin for  
 701 this study (e.g., in Figure 1). The highest taxonomic rank with p-value  $\leq 0.5$  is shown in MiGA  
 702 ID. RPD ID is the result of the identification analysis using rRNA genes (16S) implemented in  
 703 MiGA; % indicates confidence in identification. Taxonomic novelty is a MiGA analysis that  
 704 indicates the taxonomic rank at which the MAG represents a novel taxon with respect to the NCBI  
 705 Genome database; highest taxonomic rank with p-value  $\leq 0.01$  are shown.

| MAG name | Completeness (%) | Contamination (%) | N50 (bp) | Size (bp) | Taxator tk ID     | MiGA ID                        | RPD ID                       | Taxonomic novelty |
|----------|------------------|-------------------|----------|-----------|-------------------|--------------------------------|------------------------------|-------------------|
| bin.1    | 100              | 1.07              | 57370    | 1869975   | Flavobacteriaceae | Flavobacteriaceae*             | NA                           | Species****       |
| bin.4    | 99.26            | 0.24              | 81315    | 2500734   | Flavobacteriaceae | Chryseobacterium*              | Chryseobacterium<br>(100.0%) | Species****       |
| bin.2    | 98.51            | 0.42              | 36844    | 3101576   | Deinococcus       | Deinococcus grandis*           | Deinococcus<br>(100.0%)      | Subspecies****    |
| bin.7    | 97.75            | 0                 | 16123    | 2650064   | Moraxellaceae     | Psychrobacter sp.<br>PRwf-1*   | NA                           | Subspecies****    |
| bin.3    | 97.41            | 1.33              | 32961    | 4014303   | Neisseriales      | Pseudogulbenkiania*            | NA                           | Species****       |
| bin.11   | 95.65            | 0.92              | 69243    | 2786419   | Moraxellaceae     | Psychrobacter*                 | NA                           | Species****       |
| bin.10   | 95.12            | 0                 | 13409    | 2459723   | Deinococcaceae    | Deinococcus*                   | NA                           | Species****       |
| bin.12   | 93.14            | 0.85              | 24793    | 2851493   | Deinococcaceae    | Deinococcus*                   | NA                           | Species****       |
| bin.6    | 88.74            | 1.45              | 7283     | 1988194   | Micrococcales     | Arthrobacter*                  | NA                           | Species****       |
| bin.13   | 77.11            | 0.64              | 3045     | 2627969   | Deinococcaceae    | Deinococcus*                   | NA                           | Species****       |
| bin.5    | 74.13            | 0.61              | 24837    | 1635952   | Moraxellaceae     | unclassified<br>Moraxellaceae* | Alkanindiges (99<br>%)       | Species****       |
| bin.8    | 67.76            | 0                 | 10934    | 2837743   | Deinococcaceae    | Deinococcus*                   | NA                           | Species****       |

|       |       |      |      |         |                   |                                     |    |                |
|-------|-------|------|------|---------|-------------------|-------------------------------------|----|----------------|
| bin.9 | 61.13 | 0.30 | 2210 | 2110411 | Janthinobacterium | Janthinobacterium sp.<br>SNU WT3*** | NA | Subspecies**** |
|-------|-------|------|------|---------|-------------------|-------------------------------------|----|----------------|

706 Significance at p-value below: \*0.5, \*\*0.1, \*\*\*0.05, \*\*\*\*0.01

707

708 **Figure 1.** Genome-resolved metagenomic data. a) Stacked bar plot showing the relative  
709 abundances of MAGs in each louse sample. Note that samples are ordered according to host  
710 (i.e., samples from the same host are next to each other). b) Boxplot summarizing the relative  
711 abundance of each MAG across the louse samples.  
712 /

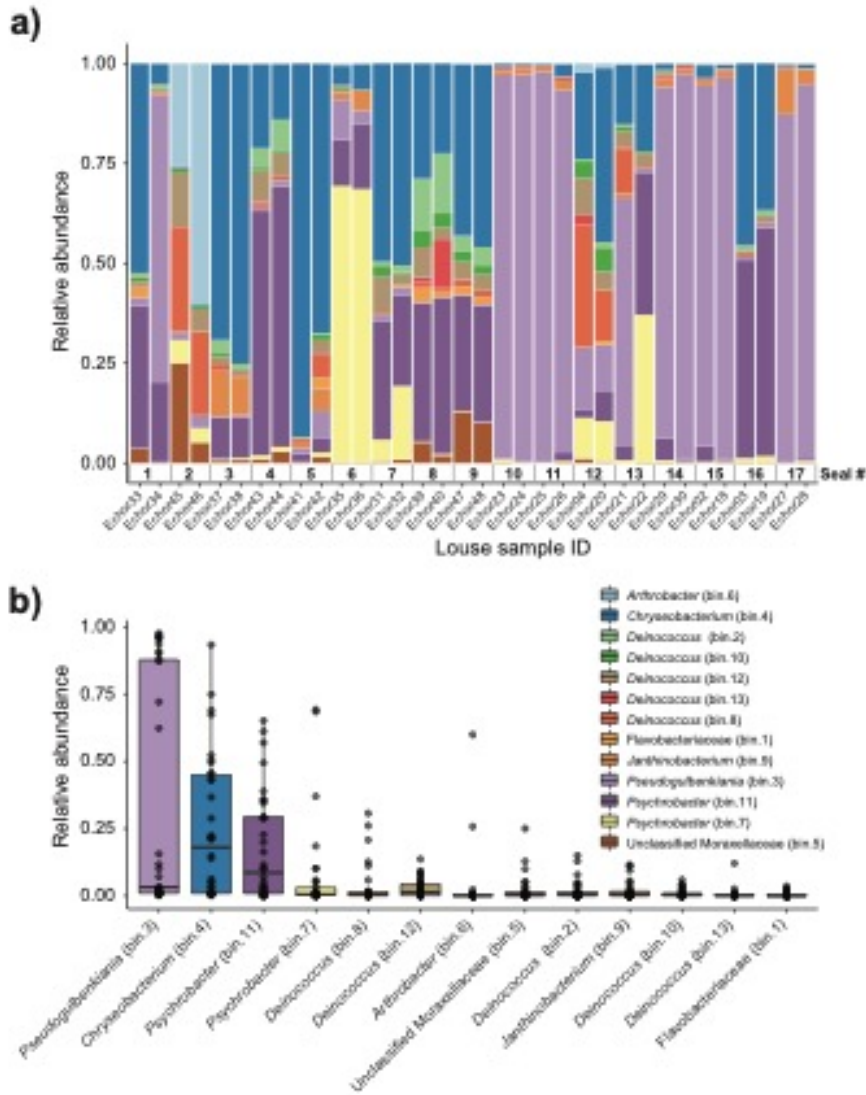

713

714 **Figure 2.** Kaiju data. a) Stacked bar plot showing bacterial relative abundances in each seal  
 715 louse sample. Note that samples are sorted according to host individual (i.e., samples from the  
 716 same host are next to each other). b) Boxplot summarizing the relative abundance of each taxon  
 717 across all louse samples.

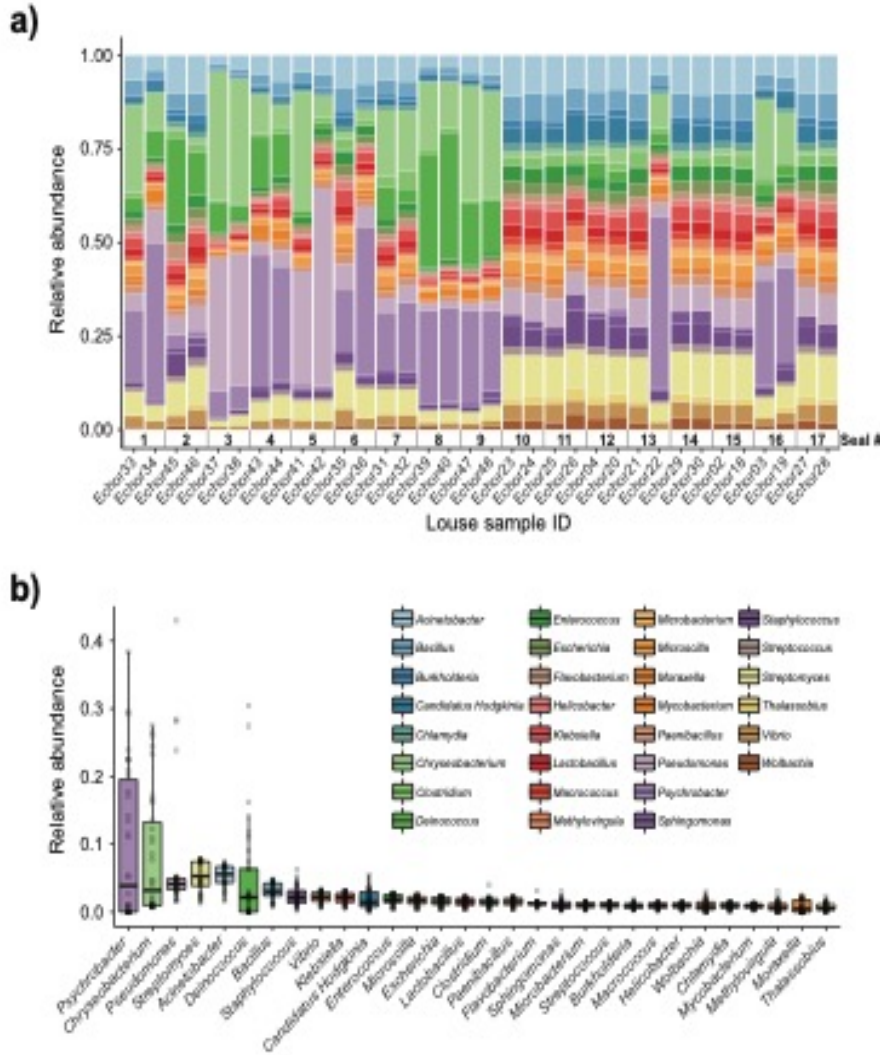

718 /  
 719

720 **Figure 3.** NMDS ordinations of seal louse microbiomes base on Bray–Curtis dissimilarity  
721 matrices. a) MAG matrix, and b) Kaiju matrix (species level). Lice originating from the same  
722 seal individual are colored similarly and connected by a line.  
723 /

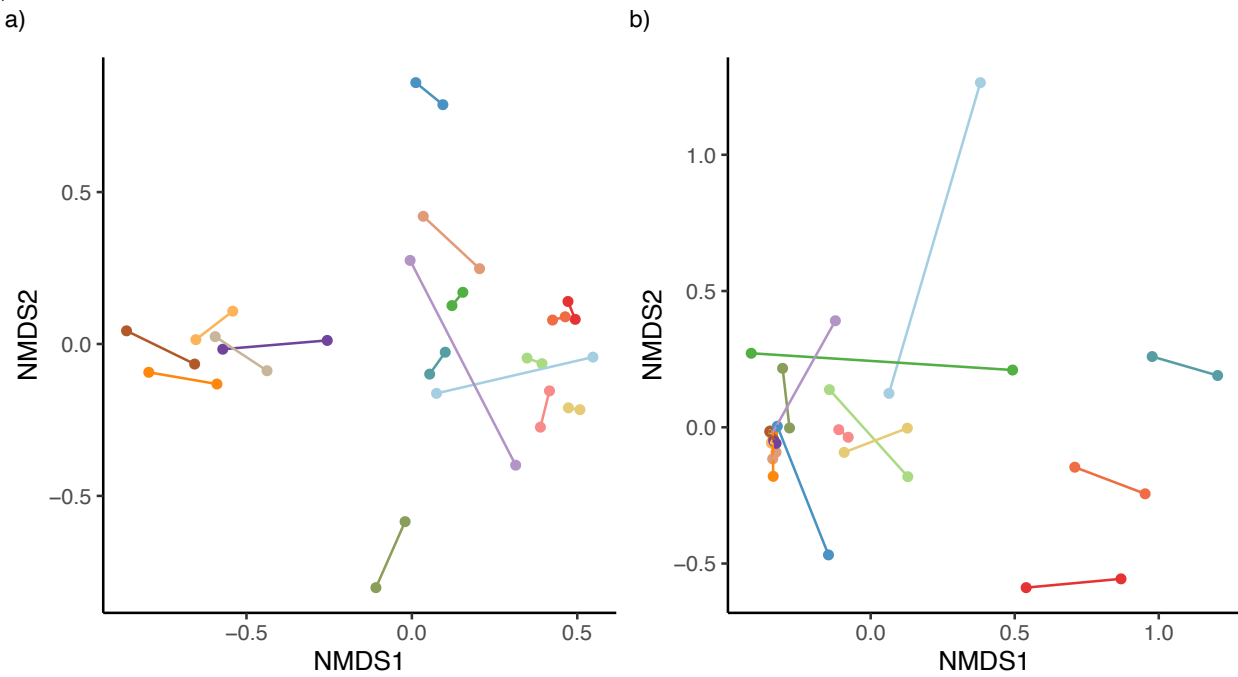

724

725 **Figure 4.** Scatter plot showing the relationship between genome size (Mb) and GC content (i.e.,  
726 proportion of G and C sites) for sequenced MAGs.

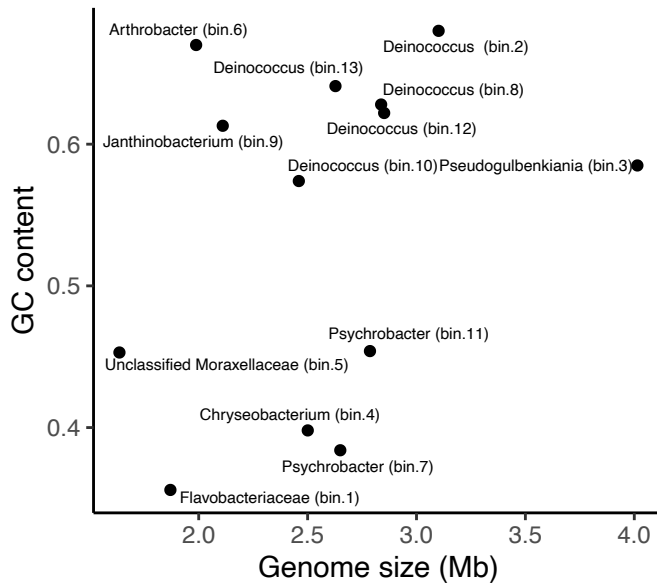

727 /

728

729
